# Supplementary material
Source: ML conference proceedings conference paper supplement (https://proceedings.neurips.cc/paper_files/paper/2021/hash/a11ce019e96a4c60832eadd755a17a58-Abstract.html)
Supplement: Supplementary file 1 [file a11ce019e96a4c60832eadd755a17a58-Supplemental.zip]

Archive with 2 entries (2 files):
- light_field_networks_comp.mp4
- light_field_networks_supplement.pdf
